# Supplementary material
Source: PubMed Central journal article supplement (PMC6485424)
Supplement: NIHMS1527187-supplement-1.pdf [file NIHMS1527187-supplement-1.pdf]

**Cell Reports, Volume 27**

**Supplemental Information**

**PAR2-Mediated cAMP Generation Suppresses**

**TRPV4-Dependent Ca<sup>2+</sup> Signaling in Alveolar**

**Macrophages to Resolve TLR4-Induced Inflammation**

**Sheikh Rayees, Jagdish Chandra Joshi, Mohammad Tauseef, Mumtaz Anwar, Sukriti Baweja, Ian Rochford, Bhagwati Joshi, Morley D. Hollenberg, Sekhar P. Reddy, and Dolly Mehta**

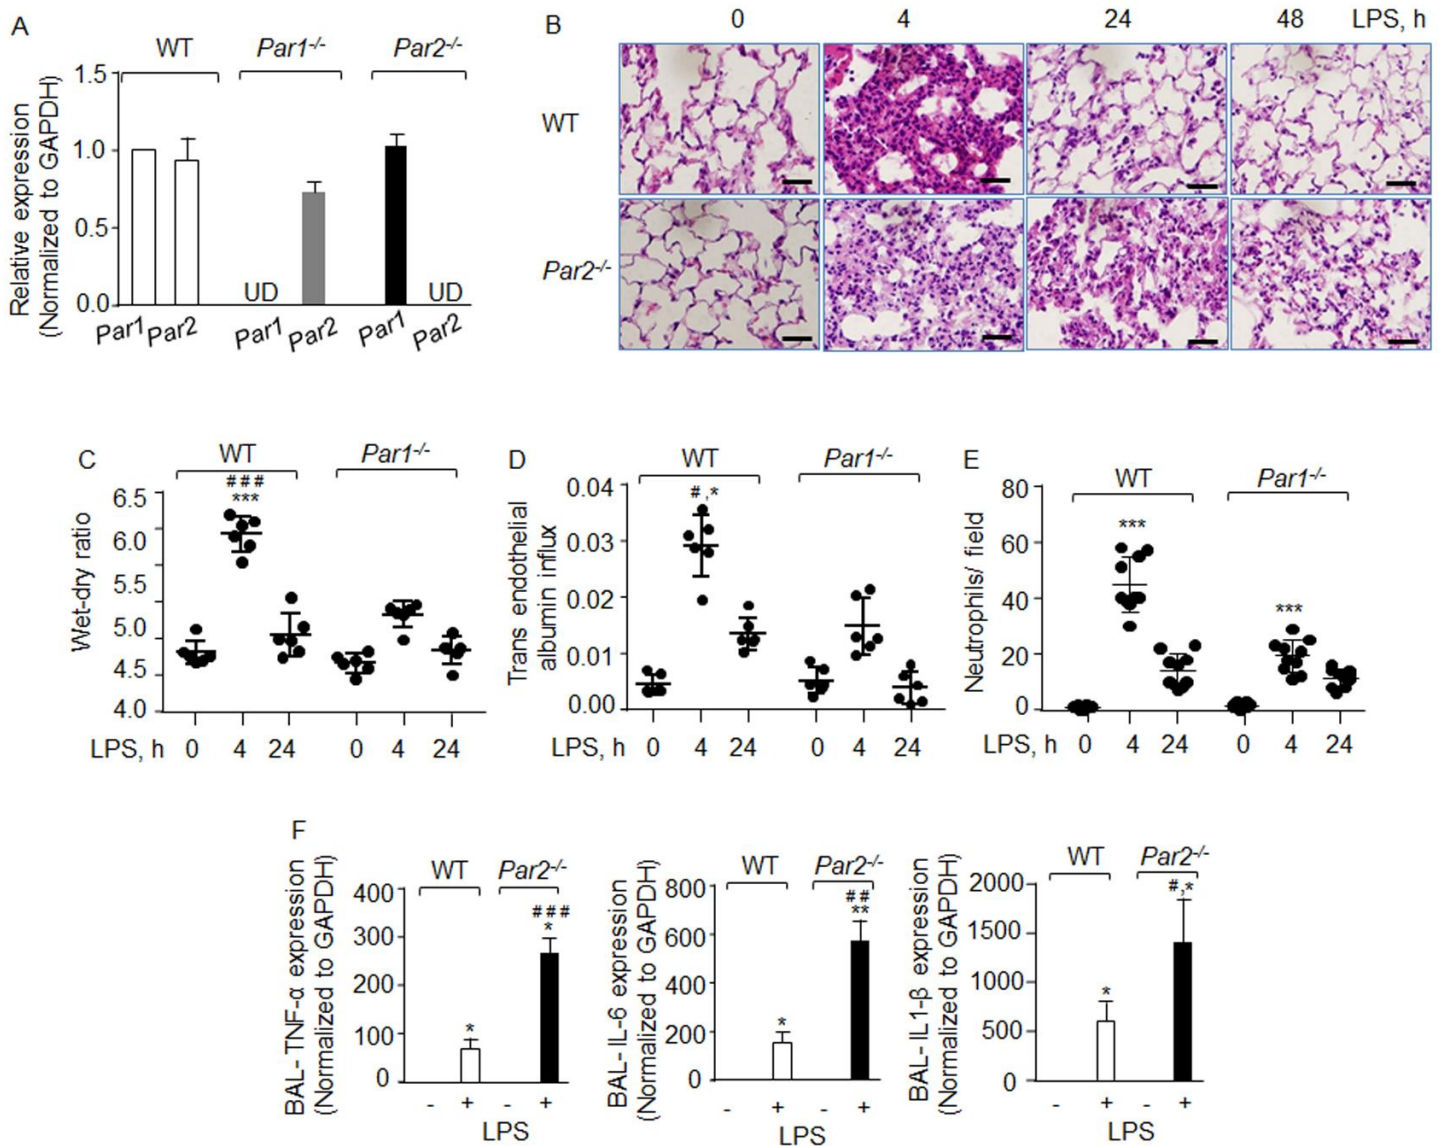

**Figure S1. LPS failed to induce lung injury in PAR1 null mice. Related to Figure 1.**

(A) Lungs from WT, *Par1*<sup>-/-</sup> and *Par2*<sup>-/-</sup> mice were harvested and the expression of *Par1* and *Par2* was determined using qPCR with GAPDH as an internal control. Data are represented as mean ± SD from three independent experiments.

(B) WT or PAR2-null lung sections were stained with hematoxylin and eosin to assess lung histology. Images show a representative trace from three individual experiments (Scale bars = 20µm).

(C-D) WT and *Par1*<sup>-/-</sup> mice were exposed to nebulized LPS (1 mg/ml) for 45 min. Thirty minutes before sacrificing the mice at indicated times, Evans blue-labelled albumin was injected retro-orbitally into each mouse. Lung vascular inflammatory injury was determined by measuring albumin influx and lung wet-dry ratio. \*, p < 0.05 and \*\*\* p < 0.001 indicate significant as compared to unchallenged control group (0h). #, p < 0.05 and ### p < 0.001 indicate values that are significantly different from corresponding *Par1*<sup>-/-</sup> group. n=6 mice/group

(E) Neutrophil count was performed (per field) on hematoxylin and eosin stained WT and *Par1*<sup>-/-</sup> lung sections at indicated times. The plot shows individual values from three independent experiments with mean ± SD. \*\*\*, p < 0.001 indicates a significant increase in neutrophil count as compared to corresponding unchallenged control group.

(F) After 24 h following LPS-induced injury, bronchoalveolar lavage fluid was obtained from WT and *Par2*<sup>-/-</sup> mice. The macrophages were isolated from BAL fluid and RNA isolated. The expression of indicated cytokines was determined using qPCR. Data are represented as mean ± SD from experiments that were performed three times individually. \*, p < 0.05 and \*\*, p < 0.01 indicate values that were significantly different from mice receiving vehicle alone (0h). #, p < 0.05; ##, p < 0.01 and ###, p < 0.001 indicate values that were significantly different from WT-mice post-24 h LPS challenge.

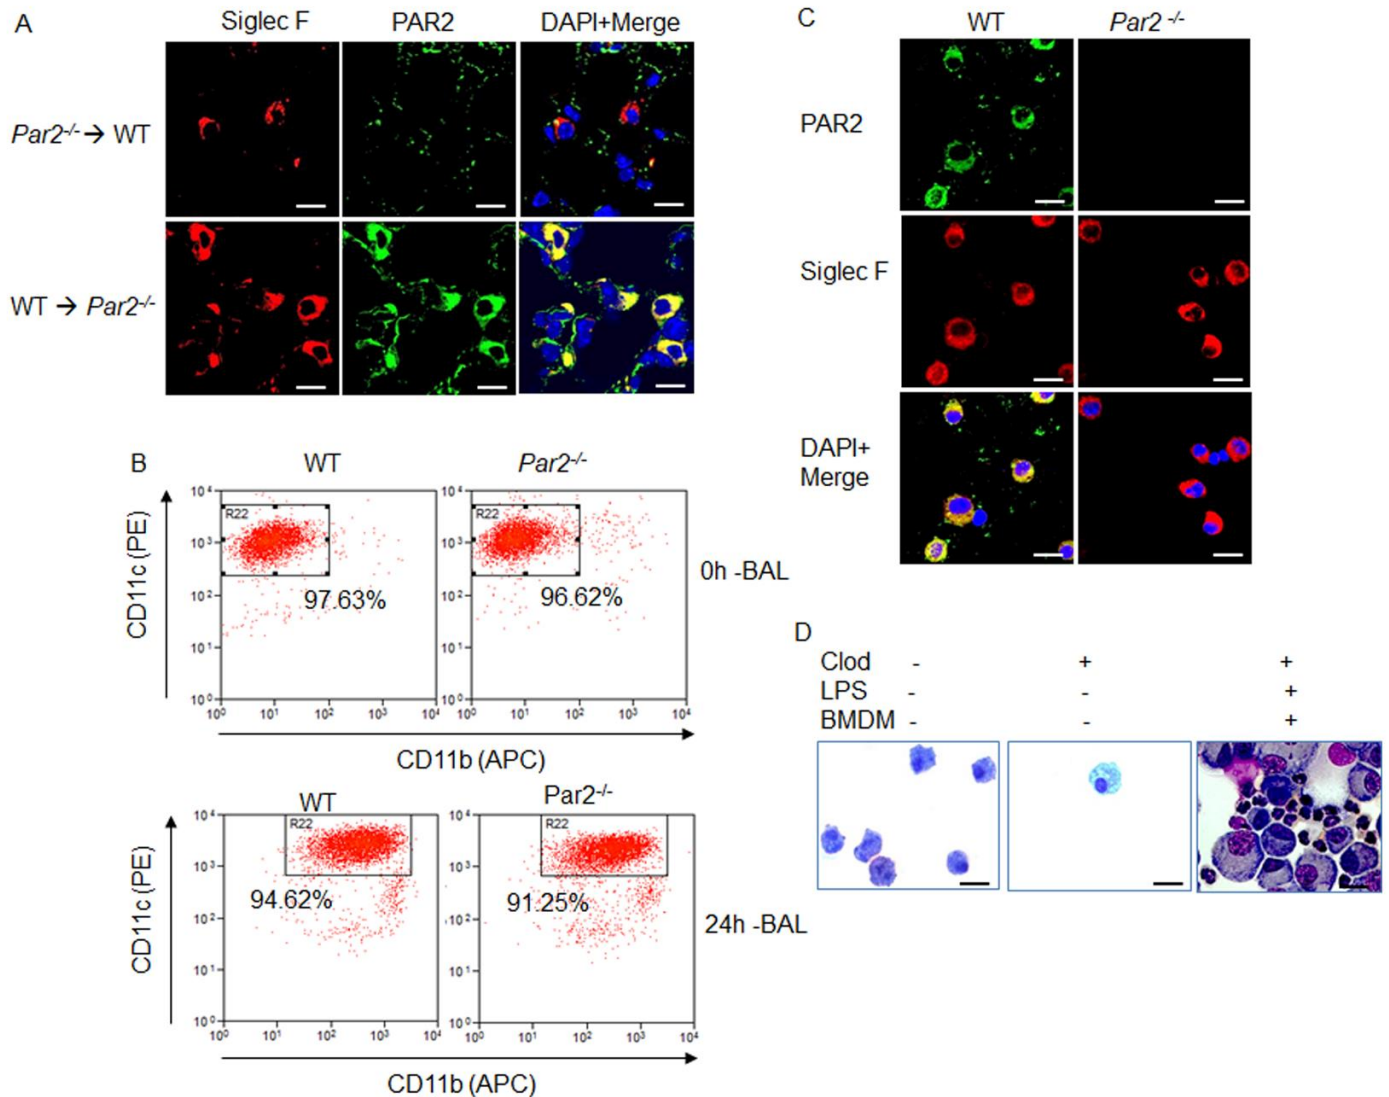

**Figure S2. PAR2 in AM resolves lung injury. Related to Figure 2.**

(A) Lung sections were stained with Siglec-F and PAR2 followed by appropriate secondary antibody treatment against PAR2. DAPI was used to stain the nuclei. The imaging was done under confocal microscope (Scale bar = 5 $\mu$ m). Representative images are shown from three independent experiments.

(B) The bronchoalveolar lavage from WT or *Par2*<sup>-/-</sup> mice was obtained, and cells were stained with CD11c-PE, CD11b-APC, PE-Cy7 CD45 and EF450 Ly6G cell markers. The cells were gated as CD45<sup>+</sup> and Ly6G<sup>-</sup>. Representative scatter plot is shown. The experiment was independently repeated three times.

(C) BAL cells from WT or PAR2 null lungs were stained with Siglec-F, anti-PAR2 antibody and appropriate secondary antibody to assess PAR2 positive AM. Representative images are shown from three independent experiments (Scale bar = 10 $\mu$ m)

(D) H and E staining of BAL showing AM depletion following clodronate injection and repletion after adoptive transfer of BMDM in WT mice lungs. Representative images are shown from three independent experiments (Scale bar = 20 $\mu$ m).

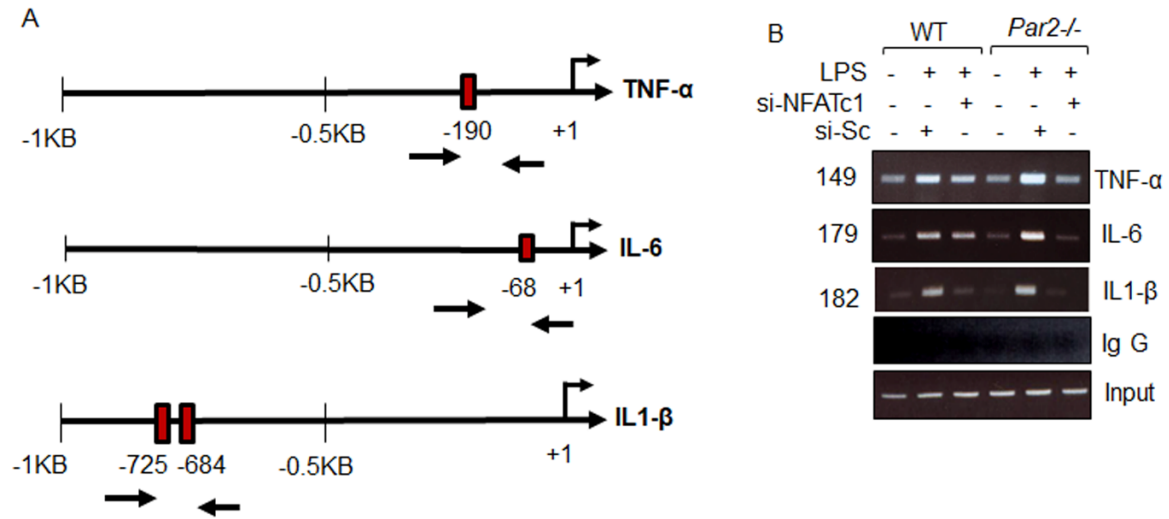

**Figure S3: ChIP assay of NF $\kappa$ B binding to the cytokine promoters in BMDM. Related to Figure 4.**

(A) Schematic diagram shows NF $\kappa$ B binding sites on the indicated cytokine promoters. Arrows indicate position of forward and reverse primers used in the assay.

(B) WT and *Par2<sup>-/-</sup>* BMDMs were transfected with si-NFATc1. After 48 h, the cells were stimulated with LPS for 4h and immunoprecipitated (IP) with IgG or antibody against NF $\kappa$ B and the resulting chromatin fragments were subjected to PCR amplification using primers spanning the IL-6, TNF- $\alpha$  and IL1- $\beta$  consensus sequences. Gels represent ChIP assays of the TNF- $\alpha$ , IL-6, and IL1- $\beta$  promoters.

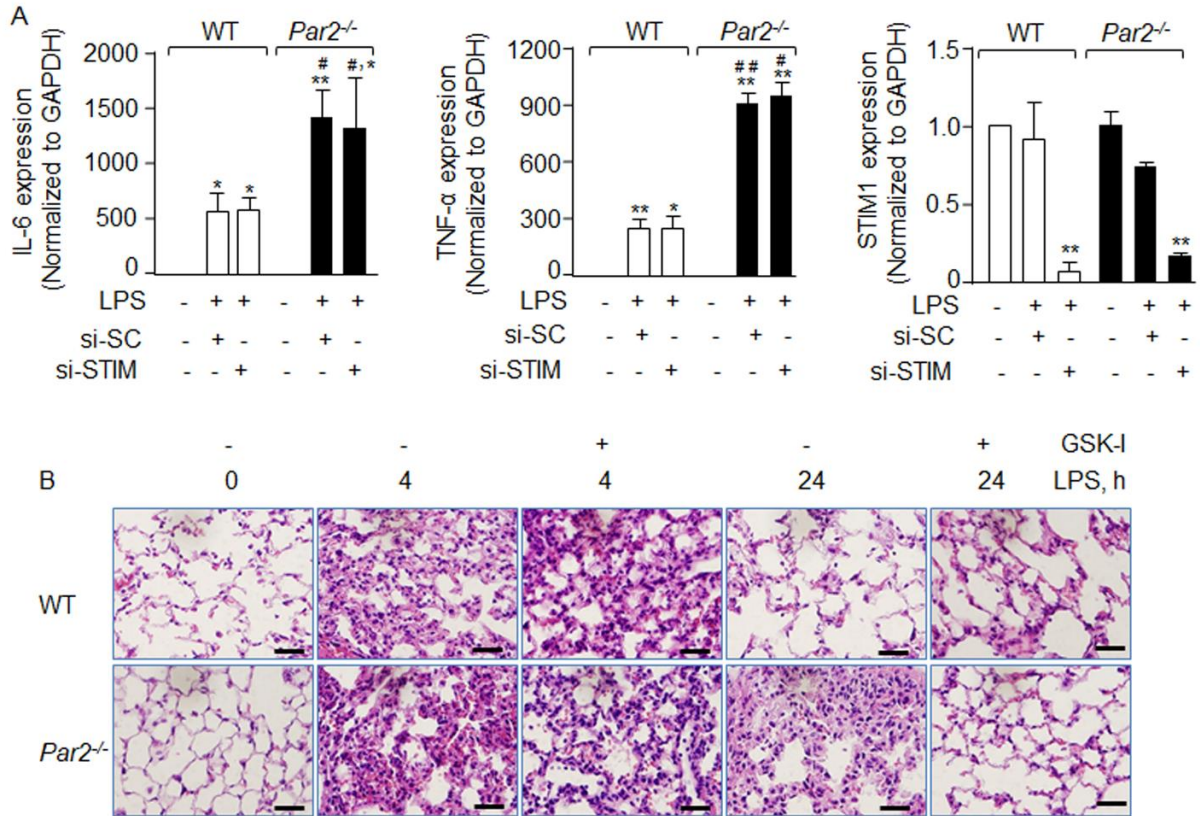

**Figure S4. Thrombin activates TRPV4 activity. Related to Figure 6 & 7.**

(A) Related to Figure 6. BMDM transfected with control or STIM1 siRNA were stimulated with 1  $\mu\text{g/ml}$  of LPS for 4 h and expression of STIM1, IL-6 and TNF- $\alpha$  was determined by qPCR. The data are represented as mean  $\pm$  SD from three independent experiments. \*,  $p < 0.05$  and \*\*,  $p < 0.01$  indicate significance from control BMDM. #,  $p < 0.05$  and ##,  $p < 0.01$  indicate significance from WT-BMDM post-LPS challenge.

(B) Related to Figure 7. WT or PAR2-null lungs receiving vector or GSK-1 post LPS challenge were stained with hematoxylin and eosin to assess lung histology. Images show a representative trace from three individual experiments (Scale bar =  $20\mu\text{m}$ ).
